# Supplementary material for: Heart-specific Rpd3 downregulation enhances cardiac function and longevity
Source: publisher site journal article supplement (doi:10.18632/aging.100806), 2015-09-21
Supplement: Supplementary file [file aging-v7i9-100806-supplementary-material-SD1.pdf]

SUPPLEMENTARY FIGURES

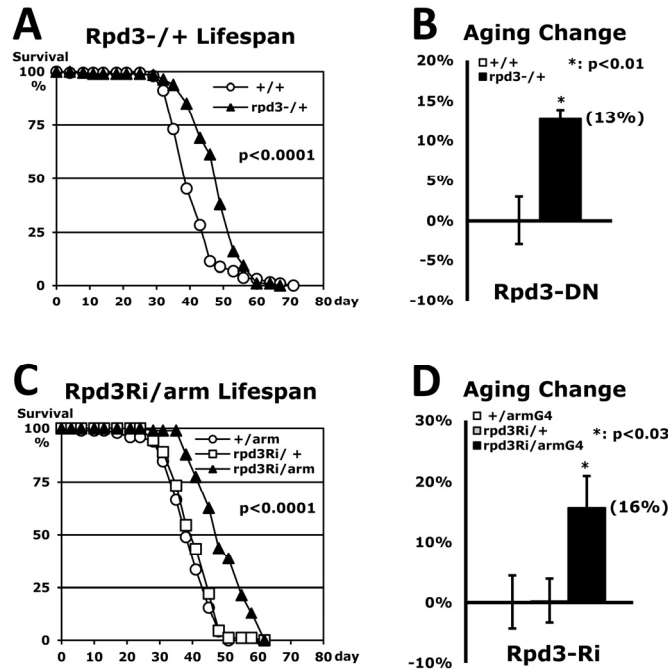

**SFigure 1. Lifespan extension of Rpd3 downregulation.** (A) The aging test comparing wild-type and *rpd3* heterozygote mutant (*rpd3-/+*), using adult male flies. (B) The increased percentage of the *rpd3* mutant's mean lifespan is indicated as mean  $\pm$  SEM normalized with respect to wild-type (39.7 days). This percentage was calculated from the lifespan curves (A) of two independent experiments. (C) The aging test between two single transgene controls (+/armG4, *rpd3Ri/+*) and the double transgene experimental (*rpd3Ri/armG4*) male flies. The p-values (log-rank test) of the two lifespan curves (A and C) indicate that lifespan increases with a decrease in *rpd3* expression. (D) Increased percentage of the mean lifespan of *rpd3Ri/armG4* is indicated as mean  $\pm$  SEM normalized by the +/armG4, which was calculated from the lifespan curves (C) of four independent experiments.

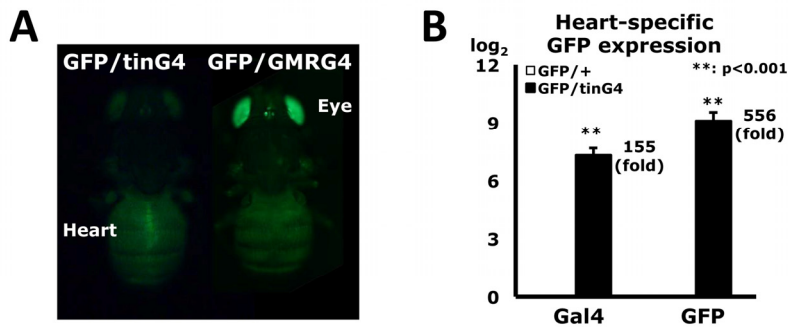

**SFigure 2. Heart-specific Gal4 expression (tinG4).** (A) **Left:** Heart-specific (tinman) GFP expression (UAS-GFP/tin-Gal4), illuminating the long heart tube from the posterior abdomen. **Right:** Eye-specific GFP expression (UAS-GFP/GMR-Gal4), used as a control. (B) Heart-specific expression levels of Gal4 and the target GFP genes from the whole body's total RNA between UAS-GFP/+ and UAS-GFP/tin-Gal4 using RT-PCR.

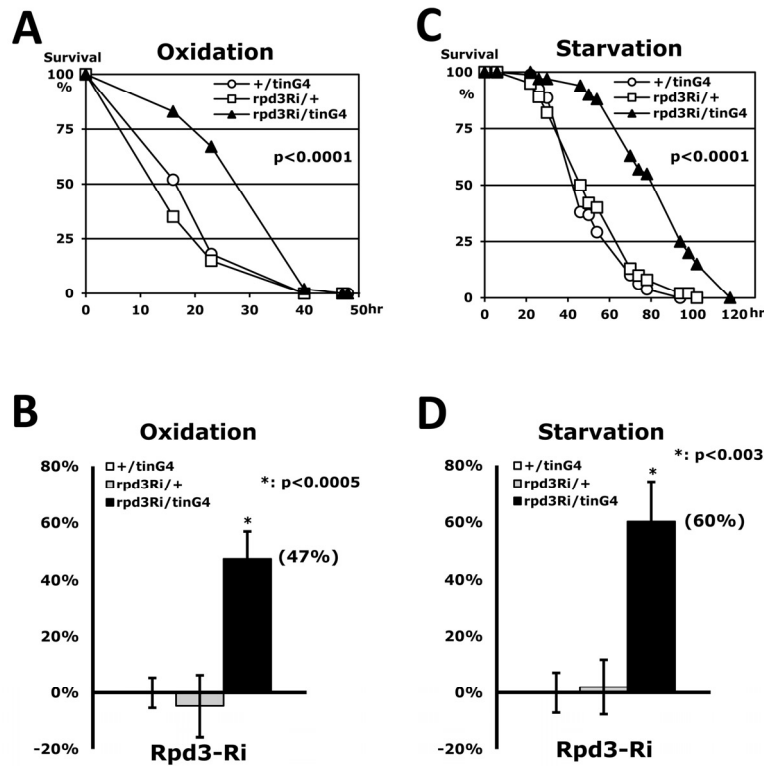

**Figure 3. Stress resistance induced by heart-specific Rpd3 downregulation in female flies.** (A and C) The response to oxidation (A) and starvation (C) stressors using 5-day-old female flies. The flies with heart-specific *rpd3* downregulation (*rpd3Ri/tinG4*) were compared to the single transgene controls (*+/tinG4* and *rpd3Ri/+*). The survival curves show that the p-values for both stressors (A and C) were statistically significant ( $P < 0.0001$ ), indicating that resistances to both stressors are enhanced also in females with heart-specific *rpd3* downregulation. (B and D) The percent change in the median survival time of flies for the stresses is indicated as mean  $\pm$  SEM, which was calculated from the stress response curves of 5 - 7 independent experiments. Parenthesis: percent change in heart specific Rpd3 downregulation as compared to the *+/tinG4* single transgene control.

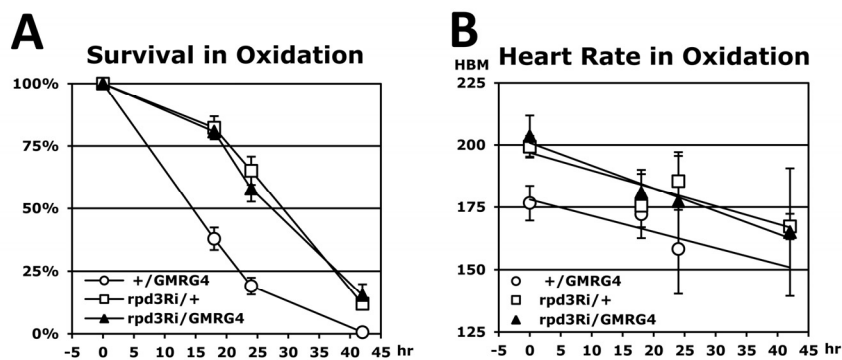

**Figure 4. Oxidative stress resistance and heart function unaffected by eye-specific Rpd3 downregulation.** (A) The survival curve for oxidative stress between 2-day-old male flies of single transgene controls and eye-specific Rpd3 downregulation (*rpd3Ri/GMRG4*), which was made with the mean  $\pm$  SEM over four independent assays. (B) The concurrent heart rate during the oxidative stress above (A). The heart rate of *+/GMRG4* at 42 hours could not be measured due to no survivorship in (A). The resultant change in heart rate between the *rpd3Ri/+* and *rpd3Ri/GMRG4* revealed that the heart rate is not changed by reduced *rpd3* expression in the eye throughout the oxidative stress.

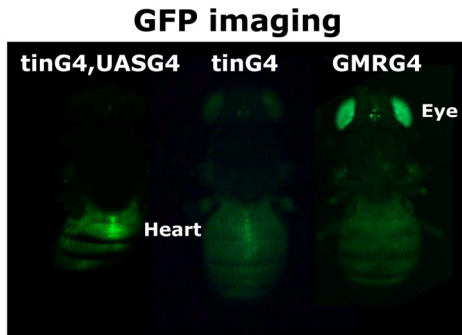

**S**Figure 5. GFP imaging with heart-specific Gal4 expression (tinG4 and tinG4, UASG4).

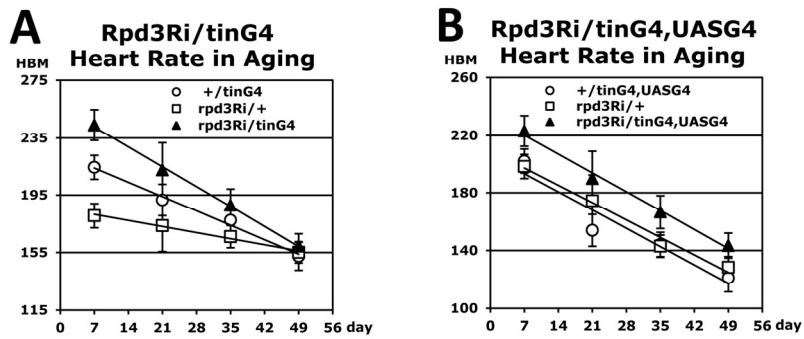

**S**Figure 6. Heart rates of flies with heart-specific Rpd3 downregulation. (A-B) Heart rates of rpd3Ri/tinG4 (A) and rpd3Ri/tinG4,UASG4 (B) were measured at the 1, 3, 5 and 7-week time points during the aging experiments in Fig. 7E. The 30 - 100 of heart rates were counted at each age and averaged for mean  $\pm$  SEM over 3 - 9 independent assays.
